# Supplementary material for: A Comprehensive Assessment of the Genetic Determinants in Salmonella Typhimurium for Resistance to Hydrogen Peroxide Using Proteogenomics
Source: PubMed Central journal article supplement (PMC5719062; doi:10.1038/s41598-017-17149-9), 2017-12-06
Supplement: 41598_2017_17149_MOESM1_ESM.pdf [file 41598_2017_17149_MOESM1_ESM.pdf]

**Supplementary information**

**A Comprehensive Assessment of the Genetic Determinants in *Salmonella* Typhimurium  
for Resistance to Hydrogen Peroxide Using Proteogenomics**

Sardar Karash<sup>1</sup>, Rohana Liyanage<sup>2,3</sup>, Abdullah Qassab<sup>1</sup>, Jackson O. Lay, Jr.<sup>2,3</sup>, and

Young Min Kwon<sup>1,4\*</sup>

<sup>1</sup>Cell and Molecular Biology Program, University of Arkansas, Fayetteville, AR 72701,

<sup>2</sup>Department of Chemistry, University of Arkansas, Fayetteville, AR 72701,

<sup>3</sup>Statewide Mass Spectrometry Facility, Fayetteville, AR 72701, and

<sup>4</sup>Department of Poultry Science, University of Arkansas, Fayetteville, AR 72701

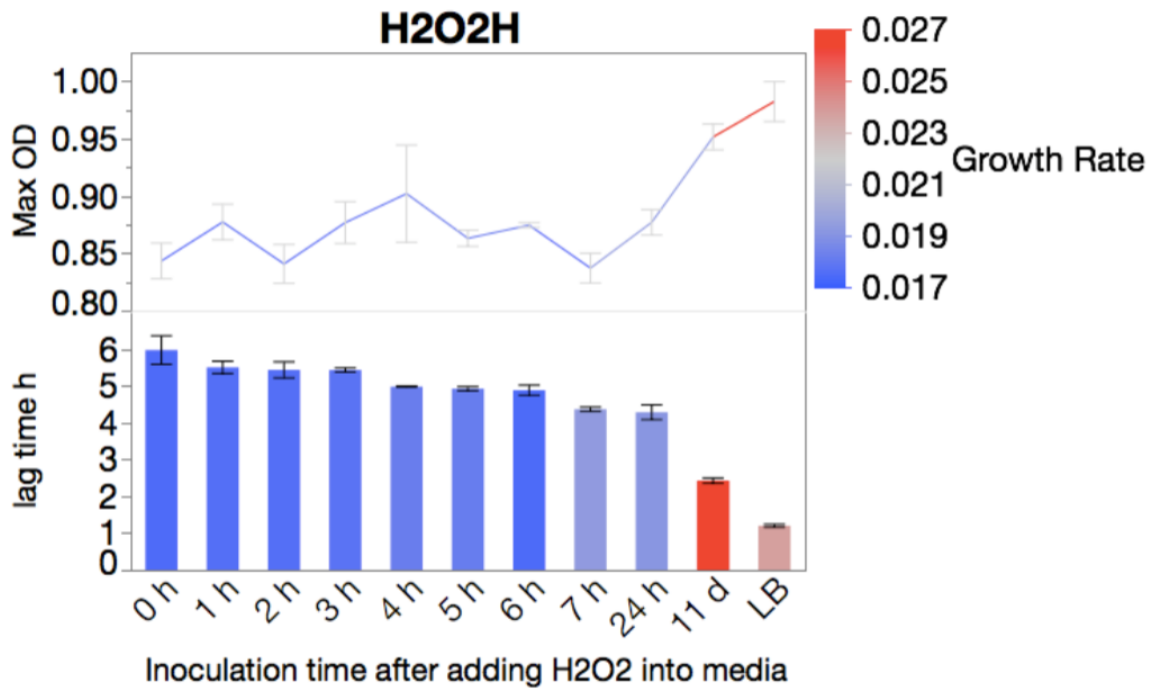

**Figure S1. Stability of H<sub>2</sub>O<sub>2</sub> in LB medium during the experiments.** LB broth media supplemented with freshly diluted 3.5 mM H<sub>2</sub>O<sub>2</sub> were left at room temperature for the indicated lengths of time before inoculation of the media with *S. Typhimurium*. The inoculated cultures were incubated at 37°C for 24 h in a 96-well plate with OD<sub>600</sub> reading every 10 minutes, and lag time and Max OD were determined. LB media free of H<sub>2</sub>O<sub>2</sub> was used as a control.

|         | Number of extracted GACAG reads >20bp | Number of Mapped Reads | Number of Unique Insertions | Mean genomic length bp | Mean reads per insertion sites | Mean distance between two adjacent insertions | Number of reads mapped to pBAM-1 | % of pBAM1  |
|---------|---------------------------------------|------------------------|-----------------------------|------------------------|--------------------------------|-----------------------------------------------|----------------------------------|-------------|
| LB      | 31728005                              | 25223444               | 125449                      | 92.9                   | 201.0653254                    | 38.822661                                     | 181359                           | 0.571605432 |
| H2O2L   | 17986240                              | 14855156               | 118169                      | 93.3                   | 125.7111087                    | 41.21439633                                   | 109506                           | 0.608832085 |
| H2O2H   | 22665911                              | 18622648               | 119801                      | 94.6                   | 155.4465155                    | 40.65294947                                   | 80421                            | 0.354810358 |
| Total   | 72380156                              | 58701248               | 363419                      |                        |                                |                                               | 371286                           | 1.535247875 |
| Average |                                       |                        |                             | 93.6                   | 160.7409832                    | 40.23000227                                   | 123762                           | 0.511749292 |
| STD     |                                       |                        |                             | 0.888819442            | 37.95507916                    | 1.250704891                                   | 51957.14689                      | 0.137181732 |

**Table S1. Summary of the Tn-seq analysis in numbers.** The numbers of extracted reads, mapped reads, and unique insertions are presented for LB (H<sub>2</sub>O<sub>2</sub> free), H<sub>2</sub>O<sub>2</sub>L (2.5 mM), and H<sub>2</sub>O<sub>2</sub>H (3.5 mM). Mean reads per insertion sites were calculated by dividing number of mapped reads by number of unique insertions, and mean distance between two adjacent insertions was calculated by dividing the length of whole genome by number of unique insertions. Reads mapped to pBAM1 represent the mutants generated by cointegration of pBAM1.

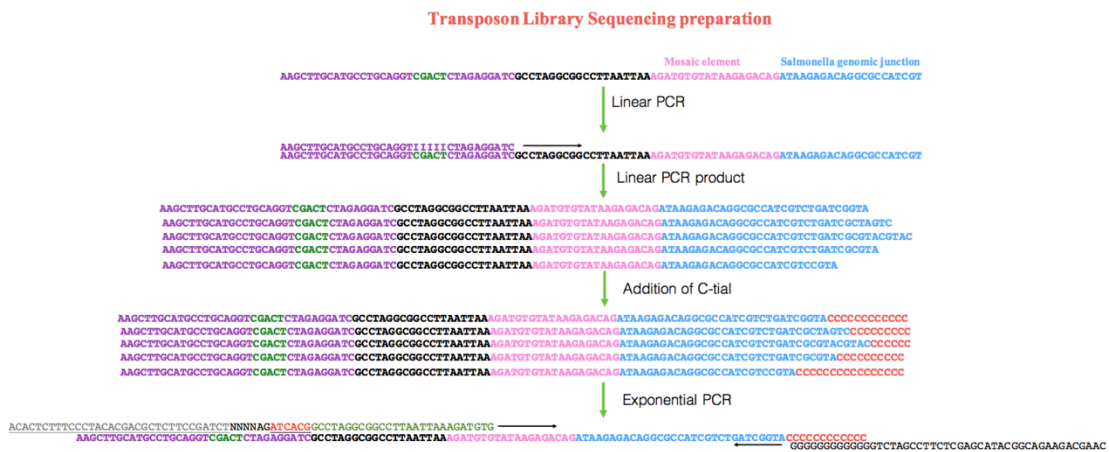

**Figure S2. Tn-seq library preparation for Illumina sequencing.** The genomic DNA was extracted from each mutant pool, and then subjected to the protocol as illustrated here. First step was linear extension using a single primer specific to one end of Tn5 to capture Tn5 junctions. The second step was to add C-tail at 3' end of the captured Tn5 junction fragments.

Lastly, the C-tailed Tn5 junction fragments were used as a template for exponential PCR using nested Tn5-specific primer and polyG primer with Illumina adaptor and a sample barcode attached. The PCR product was gel-purified and sequenced on an Illumina platform.

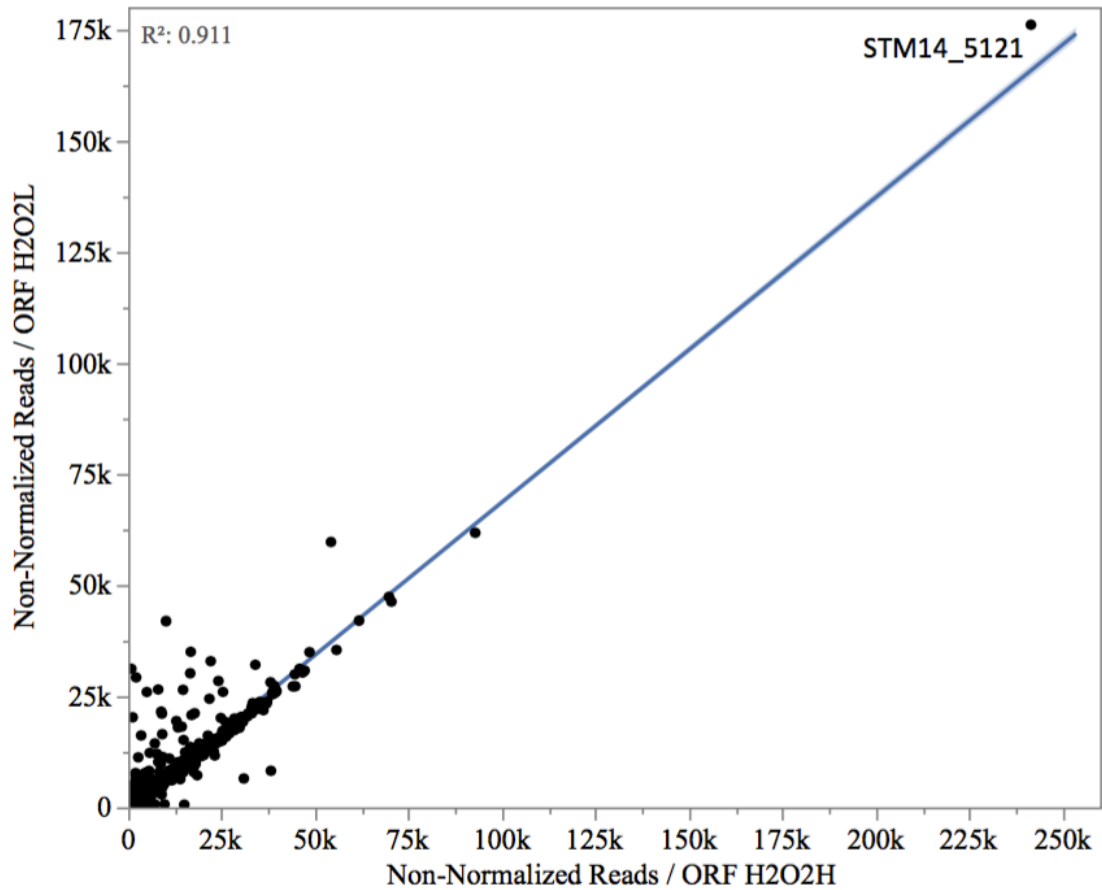

**Figure S3. The reproducibility of Tn-seq.** Correlation of the number of reads for each ORFs in *S. Typhimurium* between H<sub>2</sub>O<sub>2</sub>L (2.5 mM) and H<sub>2</sub>O<sub>2</sub>H (3.5 mM). Two ORFs (STM14\_2422 and STM14\_2428) were excluded in this analysis.

## The enriched pathways for resistance to H<sub>2</sub>O<sub>2</sub>

In order to categorize the identified genes that are required for *Salmonella* resistance to H<sub>2</sub>O<sub>2</sub>, the 137 genes were subjected to pathway enrichment analysis using DAVID Bioinformatics Resources 6.7, NIAID/NIH<sup>31</sup>. A total of 15 KEGG pathways<sup>32</sup> were recognized for 69 genes on the list. The enriched pathways include homologous recombination (*ruvC*, *polA*, *ruvA*, *ruvB*, *priB*, *recA*, *recR*, *holC*, *hold*, *recC*, *recG*), nucleotide excision repair (*uvrD*, *polA*, *uvrA*, *uvrC*), mismatch repair (*dam*, *uvrD*, *holC*, *hold*), RNA degradation (*pnp*, *hfq*, *ygdP*), purine and pyrimidine metabolism (*apaH*, *polA*, *pnp*, *arcC*, *spoT*, *holC*, *hold*, *cmk*, *dcd*, *pnp*), phenylalanine, tyrosine and tryptophan biosynthesis (*aroD*, *aroB*, *aroA*, *aroK*, *aroE\_2*), arginine and proline metabolism (*proC*, *arcC*), glycolysis and gluconeogenesis (*crr*, *pgm*, *tpiA*), oxidative phosphorylation (*atpG*, *atpA*, *cydA*), DNA replication (*polA*, *holC*, *hold*), and flagellar assembly (*fliJ*, *fliD*, *flhD*, *fliC*). Since KEGG was not able to recognize many genes on the list, we used SP\_PIR\_Keywords of functional categories, which recognized majority of the genes and categorized them into 55 functional categories (Table S3), excluding 15 uncharacterized genes (ORFs). Among these categories were stress response (*rpoE*, *lon*, *dnaJ*, *hfq*, *yaiB*), iron (*dps*, *entD*, *iscA*, *yjeB*, *yhgI*), and transcription regulation (*rcsA*, *oxyR*, *rpoE*, *yjeB*, *arcA*, *argR*, *rbsR*, *rpoS*, *fadR*, *rcsB*, *furR*, *flhD*).

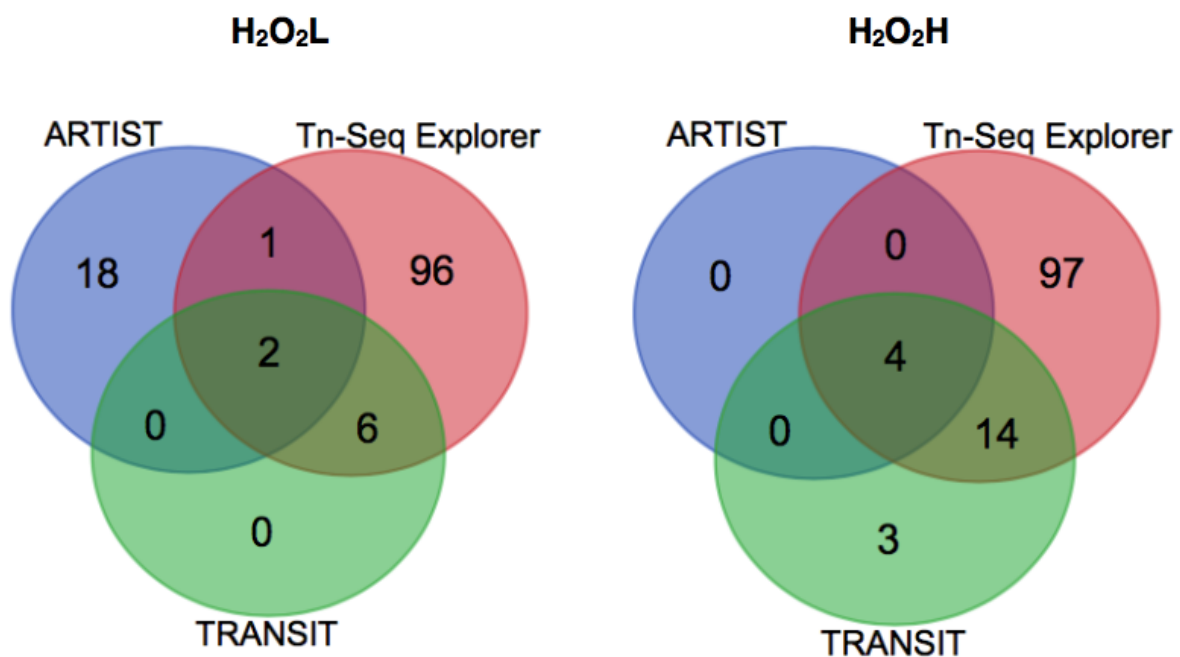

**Figure S4. Comparison of various bioinformatics pipelines for Tn-seq data analysis.** The Tn5 mutant library was grown till mid-log phase *in vitro* in LB media containing either 2.5 mM H<sub>2</sub>O<sub>2</sub> (H<sub>2</sub>O<sub>2</sub>L) or 3.5 mM H<sub>2</sub>O<sub>2</sub> (H<sub>2</sub>O<sub>2</sub>H). Three different tools were used for analysis of resulting Tn-seq data: ARTIST, Tn-seq Explorer, and TRANSIT.

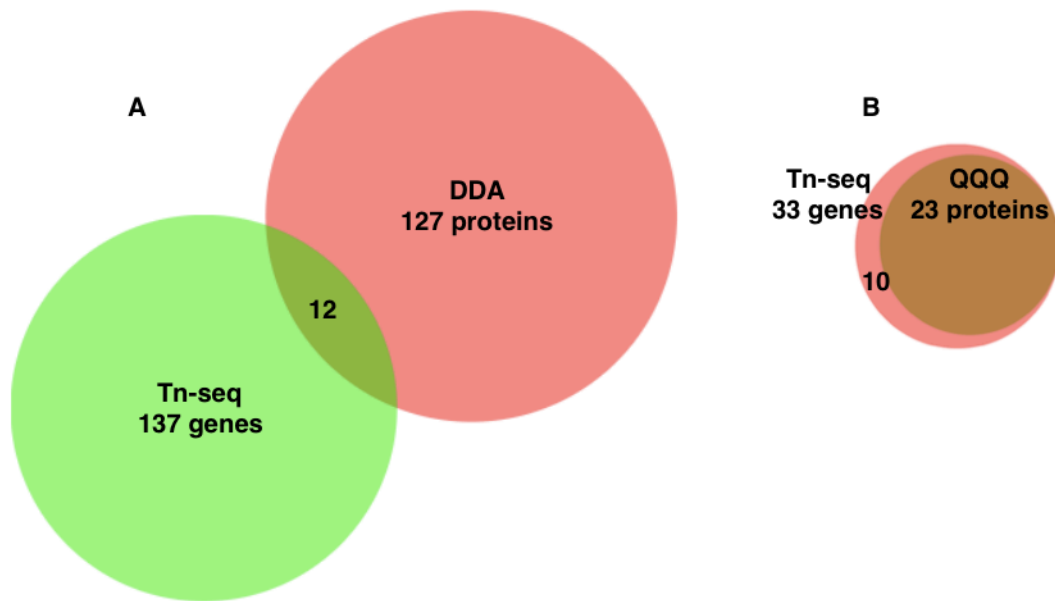

**Figure S5. Overlapping genes/proteins identified by Tn-seq and proteomics approaches.**

The Tn5 mutant library was grown till mid-log phase in the presence of two different  $\text{H}_2\text{O}_2$  for Tn-seq. The wild type strain was grown till mid-log phase for proteomics. (A) DDA (data dependent analysis) was used for proteomic analysis. The number of upregulated proteins in response to  $\text{H}_2\text{O}_2$  was 127,  $p < 0.05$ . The number of conditional essential genes for  $\text{H}_2\text{O}_2$  resistance identified by Tn-seq was 137. Overlapped genes/proteins by both methods were 12. (B) A total of 33 conditionally essential genes identified by Tn-seq were targeted in the proteomic analysis using QQQ (quadrupole mass spectrometry). The number of targeted proteins upregulated in response to  $\text{H}_2\text{O}_2$  was 23,  $p < 0.05$ .

| Functional Categories            | Count | %        | Genes                                                                                                                                                                                     |
|----------------------------------|-------|----------|-------------------------------------------------------------------------------------------------------------------------------------------------------------------------------------------|
| dna repair                       | 10    | 7.8125   | <i>ruvB, uvrC, ruvA, uvrD, uvrA, xthA, recR, ruvC, recA, polA</i>                                                                                                                         |
| DNA damage                       | 10    | 7.8125   | <i>ruvB, uvrC, ruvA, uvrD, uvrA, xthA, recR, ruvC, recA, polA</i>                                                                                                                         |
| cytoplasm                        | 22    | 17.1875  | <i>gidA, tpiA, uvrC, crr, uvrA, xerC, xerD, cmk, recA, gmhA, pnp, dps, argR, sufS, aroK, efp, fadR, aroB, dnaJ, aroA, yaiB, flhD</i>                                                      |
| dna recombination                | 7     | 5.46875  | <i>ruvB, ruvA, xerC, xerD, recR, ruvC, recA</i>                                                                                                                                           |
| sos response                     | 6     | 4.6875   | <i>ruvB, uvrC, ruvA, uvrD, uvrA, recA</i>                                                                                                                                                 |
| atp-binding                      | 20    | 15.625   | <i>atpA, sufC, ruvB, lon, uvrD, ruvA, uvrA, cmk, yjeA, recA, barA, fepC, recG, hscA, ybbL, aroK, arcB, phoL, phoR</i>                                                                     |
| hydrolase                        | 21    | 16.40625 | <i>atpA, dcd, lon, ruvB, uvrD, ruvA, recC, hutG, rnt, xthA, polA, arcA, recG, apaH, yejM, endA, lepB, degS, ruvC, ygdP, spoT</i>                                                          |
| nucleotide-binding               | 19    | 14.84375 | <i>atpA, sufC, lon, ruvB, uvrD, ruvA, uvrA, cmk, yjeA, recA, barA, fepC, recG, hscA, ybbL, aroK, arcB, phoR</i>                                                                           |
| dna-binding                      | 23    | 17.96875 | <i>rcsA, rpoE, oxyR, lon, uvrD, ruvA, uvrA, xerC, xerD, yjeB, recA, acrR, arcA, polA, dps, argR, rbsR, rpoS, fadR, rcsB, fruR, priB, flhD</i>                                             |
| metal-binding                    | 16    | 12.5     | <i>entD, iscA, uvrA, icdA, hutG, xthA, yjeB, dps, aroK, dksA, ruvC, recR, dnaJ, yhgI, pgm</i>                                                                                             |
| aromatic amino acid biosynthesis | 5     | 3.90625  | <i>aroK, aroE, aroD, aroB, aroA</i>                                                                                                                                                       |
| stress response                  | 6     | 4.6875   | <i>rpoE, lon, dnaJ, hfq, yaiB</i>                                                                                                                                                         |
| signal                           | 14    | 10.9375  | <i>yejE, fepD, barA, yejM, endA, mrdA, arcB, ybbM, degS, phoR, sthB, cysP, ompS, cbiM</i>                                                                                                 |
| amino-acid biosynthesis          | 7     | 5.46875  | <i>argR, aroK, aroA, aroD, aroB, aroA, proC</i>                                                                                                                                           |
| DNA binding                      | 4     | 3.125    | <i>rcsA, argR, rpoS, fruR</i>                                                                                                                                                             |
| zinc-finger                      | 4     | 3.125    | <i>uvrA, dksA, recR, dnaJ</i>                                                                                                                                                             |
| transferase                      | 20    | 15.625   | <i>ybaZ, fliB, rfaF, entD, crr, slrB, cmk, barA, polA, pnp, otsA, sufS, aroK, arcC, hold, holC, arcB, dam, phoR, aroA</i>                                                                 |
| dna replication                  | 5     | 3.90625  | <i>uvrD, dam, pola, dnaJ, priB</i>                                                                                                                                                        |
| activator                        | 5     | 3.90625  | <i>rcsA, fadR, rcsB, fruR, flhD</i>                                                                                                                                                       |
| exonuclease                      | 4     | 3.125    | <i>rnt, recC, xthA, polA</i>                                                                                                                                                              |
| transport                        | 14    | 10.9375  | <i>atpA, entD, crr, yejE, fepD, corA, tonB, atpG, sapC, fliJ, exbD, sthB, cysP, ompS</i>                                                                                                  |
| protein transport                | 4     | 3.125    | <i>sapC, fliJ, exbD, tonB</i>                                                                                                                                                             |
| nuclease                         | 4     | 3.125    | <i>rnt, xthA, ruvC, polA</i>                                                                                                                                                              |
| magnesium                        | 6     | 4.6875   | <i>aroK, entD, xthA, corA, ruvC, pgm</i>                                                                                                                                                  |
| flagellum                        | 4     | 3.125    | <i>fliJ, fliD, fliC, flhD</i>                                                                                                                                                             |
| repressor                        | 4     | 3.125    | <i>argR, fadR, yjeB, fruR</i>                                                                                                                                                             |
| phosphoprotein                   | 5     | 3.90625  | <i>arcB, crr, rcsB, phoA, barA</i>                                                                                                                                                        |
| helicase                         | 4     | 3.125    | <i>ruvB, ruvA, uvrD, recG</i>                                                                                                                                                             |
| nucleotidyltransferase           | 4     | 3.125    | <i>holD, holC, polA, pnp</i>                                                                                                                                                              |
| ion transport                    | 5     | 3.90625  | <i>atpA, entD, corA, ompS, atpG</i>                                                                                                                                                       |
| iron                             | 6     | 4.6875   | <i>dps, entD, iscA, yjeB, yhgI</i>                                                                                                                                                        |
| Isomerase                        | 6     | 4.6875   | <i>slpA, rpe, tpiA, gmhA, pgm</i>                                                                                                                                                         |
| excision nuclease                | 2     | 1.5625   | <i>uvrC, uvrA</i>                                                                                                                                                                         |
| capsule biogenesis/ degradation  | 2     | 1.5625   | <i>rcsA, rcsB</i>                                                                                                                                                                         |
| transcription regulation         | 13    | 10.15625 | <i>rcsA, oxyR, rpoE, yjeB, acrR, arcA, argR, rbsR, rpoS, fadR, rcsB, fruR, flhD</i>                                                                                                       |
| Transcription                    | 13    | 10.15625 | <i>rcsA, oxyR, rpoE, yjeB, acrR, arcA, argR, rbsR, rpoS, fadR, rcsB, fruR, flhD</i>                                                                                                       |
| dna integration                  | 2     | 1.5625   | <i>xerC, xerD</i>                                                                                                                                                                         |
| Chromosome partition             | 2     | 1.5625   | <i>xerC, xerD</i>                                                                                                                                                                         |
| Chaperone                        | 4     | 3.125    | <i>sthB, dnaJ, hscB, hscA</i>                                                                                                                                                             |
| kinase                           | 7     | 5.46875  | <i>aroK, arcC, arcB, crr, cmk, phoR, barA</i>                                                                                                                                             |
| trna processing                  | 3     | 2.34375  | <i>gidA, rnt, yhdG</i>                                                                                                                                                                    |
| cell membrane                    | 12    | 9.375    | <i>atpA, rpe, yejE, lepB, sapC, fliJ, fepD, corA, tonB, ompS, yejM, atpG</i>                                                                                                              |
| membrane                         | 13    | 10.15625 | <i>atpA, rpe, yejE, lepB, sapC, fliJ, fepD, corA, sthB, tonB, ompS, yejM, atpG</i>                                                                                                        |
| dna excision                     | 2     | 1.5625   | <i>uvrC, uvrA</i>                                                                                                                                                                         |
| nadp                             | 3     | 2.34375  | <i>icdA, aroA, proC</i>                                                                                                                                                                   |
| cf(1)                            | 2     | 1.5625   | <i>atpA, atpG</i>                                                                                                                                                                         |
| Protease                         | 4     | 3.125    | <i>lon, degS, lepB, araH</i>                                                                                                                                                              |
| cell inner membrane              | 7     | 5.46875  | <i>atpA, lepA, sapC, corA, tonB, yejM, atpG</i>                                                                                                                                           |
| two-component regulatory system  | 4     | 3.125    | <i>arcB, rcsB, phoA, barA</i>                                                                                                                                                             |
| Sigma factor                     | 2     | 1.5625   | <i>rpoE, rpoS</i>                                                                                                                                                                         |
| rna-binding                      | 3     | 2.34375  | <i>hfq, pnp</i>                                                                                                                                                                           |
| bacterial flagellum biogenesis   | 2     | 1.5625   | <i>fliJ, flhD</i>                                                                                                                                                                         |
| bacterial flagellum              | 2     | 1.5625   | <i>fliD, fliC</i>                                                                                                                                                                         |
| atp synthesis                    | 2     | 1.5625   | <i>atpA, atpG</i>                                                                                                                                                                         |
| Hydrogen ion transport           | 2     | 1.5625   | <i>atpA, atpG</i>                                                                                                                                                                         |
| Unknown ORF                      | 15    |          | <i>STM14_0196, STM14_1174, STM14_1758, STM14_1944, STM14_2358, STM14_2430, STM14_3007, STM14_3217, STM14_3219, STM14_3285, STM14_5452, STM14_5491, STM14_5494, STM14_5495, STM14_5517</i> |

**Table S3. Functional categories for the 137 genes conditionally essential for *S. Typhimurium* resistance to H<sub>2</sub>O<sub>2</sub>.** SP\_PIR\_Keywords were used with default options for functional categories analysis for all 137 conditionally essential genes identified in this study. The gene recognition by the analysis tool was based on official gene symbols.



| Pathways                                                                                                           | Proteins                                                                                                                                                                                                                                 |
|--------------------------------------------------------------------------------------------------------------------|------------------------------------------------------------------------------------------------------------------------------------------------------------------------------------------------------------------------------------------|
| Ribosome                                                                                                           | RplB, RplC, RplD, RplE, RplI, RplJ, RplK, RplL, RplM, RplN, RplO, RplP, RplQ, RplR, RplT, RplU, RplV, RplW, RplX, RpmA, RpmD, RpmI, RpoA, RpoC, RpsA, RpsB, RpsC, RpsD, RpsE, RpsG, RpsH, RpsI, RpsJ, RpsK, RpsL, RpsM, RpsO, RpsS, RpsU |
| Glycolysis / Gluconeogenesis                                                                                       | AdhP, Acs, AceF, <b>Eno</b> , AceE, PykF, <b>Crr</b> , <b>GpmA</b> , FbaB, LpdA, GlpX, Pgm, PfkB, <b>Pgk</b>                                                                                                                             |
| Pyruvate metabolism                                                                                                | Acs, AceF, AceE, PykF, <b>AccB</b> , Mdh, Pta, Ppc, LldD, LpdA, GloA, <b>PfIB</b>                                                                                                                                                        |
| Pentose phosphate pathway                                                                                          | <b>PrsA</b> , TalB, FbaB, DeoB, RpiA, Eda, GlpX, Pgm, PfkB                                                                                                                                                                               |
| Citrate cycle (TCA cycle)                                                                                          | SucB, AceF, AceE, AcnB, IcdA, Mdh, LpdA, GltA                                                                                                                                                                                            |
| Amino sugar and nucleotide sugar metabolism                                                                        | GalK, ManA, <b>Crr</b> , GalT, GalE, YfbG, ManX, Pgm, NagZ                                                                                                                                                                               |
| Propanoate metabolism                                                                                              | Acs, <b>AccB</b> , Pta, PrpE, PflB, PrpC                                                                                                                                                                                                 |
| Fatty acid biosynthesis                                                                                            | <b>FabI</b> , <b>FabG</b> , <b>AccB</b> , FabF, <b>FabB</b>                                                                                                                                                                              |
| Purine metabolism                                                                                                  | <b>PrsA</b> , GuaB, PykF, <b>RpoC</b> , <b>Adk</b> , <b>RpoA</b> , Hpt, Ndk, DeoB                                                                                                                                                        |
| Galactose metabolism                                                                                               | GalK, GalT, GalE, Pgm, PfkB                                                                                                                                                                                                              |
| Streptomycin biosynthesis                                                                                          | RfbA, Pgm, RfbD                                                                                                                                                                                                                          |
| Riboflavin metabolism                                                                                              | <b>RibH</b> , PhoN                                                                                                                                                                                                                       |
| Fructose and mannose metabolism                                                                                    | ManA, FbaB, GlpX, ManX, PfkB                                                                                                                                                                                                             |
| Glyoxylate and dicarboxylate metabolism                                                                            | AcnB, Mdh, Eda, GltA                                                                                                                                                                                                                     |
| Pyrimidine metabolism                                                                                              | Upp, <b>RpoC</b> , PyrC, <b>RpoA</b> , Ndk                                                                                                                                                                                               |
| Glycine, serine and threonine metabolism                                                                           | <b>Asd</b> , GcvP, LpdA, GlyA                                                                                                                                                                                                            |
| RNA degradation                                                                                                    | GroEL, <b>Eno</b> , <b>Rho</b>                                                                                                                                                                                                           |
| Two-component system                                                                                               | PhoN, ArcB, GlnB, CpxR, PhoP, ArcA, FliC                                                                                                                                                                                                 |
| gamma-Hexachlorocyclohexane degradation                                                                            | PhoN, DlhH                                                                                                                                                                                                                               |
| Fructose and mannose metabolism                                                                                    | ManA, GlpX, ManX, PfkB                                                                                                                                                                                                                   |
| RNA polymerase                                                                                                     | <b>RpoC</b> , <b>RpoA</b>                                                                                                                                                                                                                |
| Red are upregulated proteins, blue are downregulated, and bold are essential proteins/genes (based on the Tn-seq). |                                                                                                                                                                                                                                          |

**Table S6. Differentially expressed proteins of *S. Typhimurium* in response to H<sub>2</sub>O<sub>2</sub> and their pathways.** *S. Typhimurium* wild type strain was grown in LB (H<sub>2</sub>O<sub>2</sub> free), H<sub>2</sub>O<sub>2</sub>L (2.5 mM), or H<sub>2</sub>O<sub>2</sub>H (3.5 mM) till mid-log phase. KEGG pathway analysis was used to categorize differentially expressed proteins (p < 0.05). Blue for downregulated proteins, red for upregulated proteins and bold represents essential proteins.
